# Supplementary material for: Sm/Ti co-substituted bismuth ferrite multiferroics: reciprocity between tetragonality and piezoelectricity
Source: Royal Society of Chemistry journal article supplement (doi:10.1039/c7cp01849e), 2017-01-01
Supplement: c7cp01849e1.pdf [file c7cp01849e1.pdf]

### Supplementary Tables

Table SI: Rietveld parameters for Ti substituted BFO

| Samples  | Phase                             | Lattice Parameters              | Atoms   | x                        | y       | z                                                                              | R-factors                                                                     |         |                                                                             |
|----------|-----------------------------------|---------------------------------|---------|--------------------------|---------|--------------------------------------------------------------------------------|-------------------------------------------------------------------------------|---------|-----------------------------------------------------------------------------|
| x = 0.04 | R3c                               | a=b=5.587Å,<br>c=13.859Å        | Bi      | 0                        | 0       | 0                                                                              | $R_p = 3.34, R_{wp} = 3.42,$<br>$R_{Bragg} = 11.3, R_F = 15.7, \chi^2 = 1.04$ |         |                                                                             |
|          |                                   |                                 | Fe/Ti   | 0                        | 0       | 0.23981                                                                        |                                                                               |         |                                                                             |
|          |                                   |                                 | O       | 0.55348                  | 0.797   | 0.95114                                                                        |                                                                               |         |                                                                             |
| x = 0.08 | R3c                               | a=b=5.575Å,<br>c=13.830Å        | Bi      | 0                        | 0       | 0                                                                              | $R_p = 3.17, R_{wp} = 2.27,$<br>$R_{Bragg} = 6.46, R_F = 8.40, \chi^2 = 1.67$ |         |                                                                             |
|          |                                   |                                 | Fe/Ti   | 0                        | 0       | 0.22492                                                                        |                                                                               |         |                                                                             |
|          |                                   |                                 | O       | 0.57555                  | 0.6101  | 0.95331                                                                        |                                                                               |         |                                                                             |
| x = 0.12 | R3c                               | a=b=5.596Å,<br>c=13.863Å        | Bi      | 0                        | 0       | 0                                                                              | $R_p = 3.69, R_{wp} = 3.7,$<br>$R_{Bragg} = 13.8, R_F = 6.46, \chi^2 = 1.88$  |         |                                                                             |
|          |                                   |                                 | Fe/Ti   | 0                        | 0       | 0.247                                                                          |                                                                               |         |                                                                             |
|          |                                   |                                 | O       | 0.54157                  | 0.5182  | 0.9612                                                                         |                                                                               |         |                                                                             |
| x = 0.16 | R3c                               | a=b=5.631Å,<br>c=13.714Å        | Bi      | 0                        | 0       | 0                                                                              | $R_p = 2.42, R_{wp} = 2.33,$<br>$R_{Bragg} = 3.83, R_F = 2.41, \chi^2 = 1.57$ |         |                                                                             |
|          |                                   |                                 | Fe/Ti   | 0                        | 0       | 0.25505                                                                        |                                                                               |         |                                                                             |
|          |                                   |                                 | O       | 0.75089                  | 0.55213 | 0.43506                                                                        |                                                                               |         |                                                                             |
|          | Pnma                              | a=5.067Å, b=6.445Å,<br>c=5.591Å | Bi      | 0.154                    | 0.25    | 0.95345                                                                        | $R_p = 2.52, R_{wp} = 4.16,$<br>$R_{Bragg} = 9.20, R_F = 7.96, \chi^2 = 1.57$ |         |                                                                             |
|          |                                   |                                 | Fe/Ti   | 0                        | 0       | 0                                                                              |                                                                               |         |                                                                             |
|          |                                   |                                 | O1      | 0.76382                  | 0.25    | 0.02232                                                                        |                                                                               |         |                                                                             |
|          |                                   |                                 | O2      | 0.26087                  | 2.46498 | 0.00831                                                                        | phase1= 49.2%, phase2= 50.8%                                                  |         |                                                                             |
|          |                                   |                                 | R3c     | a=b=5.674Å,<br>c=13.844Å | Bi      | 0                                                                              | 0                                                                             | 0       | $R_p = 4.16, R_{wp} = 4.0,$<br>$R_{Bragg} = 7.4, R_F = 5.21, \chi^2 = 1.12$ |
|          |                                   |                                 |         |                          | Fe/Ti   | 0                                                                              | 0                                                                             | 0.25505 |                                                                             |
| O        | 0.75089                           | 0.55213                         |         |                          | 0.43506 |                                                                                |                                                                               |         |                                                                             |
| Pnma     | a=5.0934Å,<br>b=6.5582Å, c=5.625Å | Bi                              | 0.154   | 0.25                     | 0.95345 | $R_p = 2.266, R_{wp} = 3.21,$<br>$R_{Bragg} = 9.42, R_F = 6.92, \chi^2 = 1.12$ |                                                                               |         |                                                                             |
|          |                                   | Fe/Ti                           | 0       | 0                        | 0       |                                                                                |                                                                               |         |                                                                             |
|          |                                   | O1                              | 0.76382 | 0.25                     | 0.02232 |                                                                                |                                                                               |         |                                                                             |
|          |                                   | O2                              | 0.26087 | 2.46498                  | 0.00831 |                                                                                | phase1= 45.96%, phase2= 54.04%                                                |         |                                                                             |
|          |                                   |                                 |         |                          |         |                                                                                |                                                                               |         |                                                                             |

Table II: Lattice Parameters, atomic positions and Rietveld refined factors of  $\text{Bi}_{1-x}\text{Sm}_x\text{FeO}_3$

| Samples  | Phase              | Lattice Parameters                | Atoms | x           | y       | z       | R-factors                                                                             |                                                                                      |
|----------|--------------------|-----------------------------------|-------|-------------|---------|---------|---------------------------------------------------------------------------------------|--------------------------------------------------------------------------------------|
| x = 0.04 | R3c                | a = b = 5.580Å, c = 13.855Å       | Bi/Sm | 0           | 0       | 0       | $R_p = 2.57, R_{wp} = 2.27,$<br>$R_{\text{Bragg}} = 11.1, R_F = 7.50, \chi^2 = 1.176$ |                                                                                      |
|          |                    |                                   | Fe    | 0           | 0       | 0.22229 |                                                                                       |                                                                                      |
|          |                    |                                   | O     | 0.4423      | 0.01169 | 0.9549  |                                                                                       |                                                                                      |
| x = 0.08 | R3c                | a = b = 5.569, c = 13.815Å        | Bi/Sm | 0           | 0       | 0       | $R_p = 4.08, R_{wp} = 2.51,$<br>$R_{\text{Bragg}} = 9.36, R_F = 7.06, \chi^2 = 1.91$  |                                                                                      |
|          |                    |                                   | Fe    | 0           | 0       | 0.2158  |                                                                                       |                                                                                      |
|          |                    |                                   | O     | 0.49339     | 0.0627  | 0.94666 |                                                                                       |                                                                                      |
| x = 0.12 | R3c                | a = b = 5.565Å, c = 13.791Å       | Bi/Sm | 0           | 0       | 0       | $R_p = 3.93, R_{wp} = 2.42,$<br>$R_{\text{Bragg}} = 7.93, R_F = 6.08, \chi^2 = 1.13$  |                                                                                      |
|          |                    |                                   | Fe    | 0           | 0       | 0.22319 |                                                                                       |                                                                                      |
|          |                    |                                   | O     | 0.53771     | 0.06851 | 0.96075 |                                                                                       |                                                                                      |
| x = 0.16 | R3c                | a = b = 5.541Å,<br>13.709         | c =   | Bi/Sm       | 0       | 0       | $R_p = 4.62, R_{wp} = 3.37,$<br>$R_{\text{Bragg}} = 12.3, R_F = 7.32, \chi^2 = 1.86$  |                                                                                      |
|          |                    |                                   | Fe    | 0           | 0       | 0.24552 |                                                                                       |                                                                                      |
|          |                    |                                   | O     | 0.0578      | 0.26556 | 0.4031  |                                                                                       |                                                                                      |
|          | Pn <sub>2</sub> 1a | a = 5.593Å, b = 7.881Å,<br>5.405Å | c =   | Bi/Sm       | 0.00338 | 0.23821 | 1.00193                                                                               | $R_p = 4.62, R_{wp} = 3.37,$<br>$R_{\text{Bragg}} = 16.4, R_F = 12.3, \chi^2 = 1.86$ |
|          |                    |                                   |       | Fe          | 0.04025 | 0       | 0.44432                                                                               |                                                                                      |
|          |                    |                                   |       | O1          | 0.55611 | 0.96715 | 0.41387                                                                               |                                                                                      |
|          |                    |                                   | O2    | 0.32532     | 0.15707 | 0.05413 | phase1 = 66.72%, phase2 = 33.28%                                                      |                                                                                      |
|          |                    |                                   | O3    | 0.95438     | 0.63235 | 0.96866 |                                                                                       |                                                                                      |
| x = 0.20 | R3c                | a = b = 5.5388Å,<br>= 13.701Å     | c =   | Bi/Sm       | 0       | 0       | $R_p = 3.88, R_{wp} = 3.01,$<br>$R_{\text{Bragg}} = 10.9, R_F = 6.93, \chi^2 = 1.04$  |                                                                                      |
|          |                    |                                   | Fe    | 0           | 0       | 0.23064 |                                                                                       |                                                                                      |
|          |                    |                                   | O     | 0.05<br>293 | 0.69359 | 0.3997  |                                                                                       |                                                                                      |
|          | Pn <sub>2</sub> 1a | a = 5.602Å, b = 7.787Å,<br>5.415Å | c =   | Bi/Sm       | 0.0415  | 0.26189 | 1.01555                                                                               | $R_p = 3.88, R_{wp} = 3.01,$<br>$R_{\text{Bragg}} = 8.52, R_F = 6.54, \chi^2 = 1.04$ |
|          |                    |                                   |       | Fe          | 0.02709 | 0       | 0.47341                                                                               |                                                                                      |
|          |                    |                                   |       | O1          | 0.46321 | 0.27593 | 0.08442                                                                               |                                                                                      |
|          |                    |                                   | O2    | 0.30145     | 0.59029 | 0.12903 | phase1 = 43.43%, phase2 = 56.57%                                                      |                                                                                      |
|          |                    |                                   | O3    | 0.27044     | 0.44076 | 0.27087 |                                                                                       |                                                                                      |

Table III: Lattice Parameters, atomic positions and fitting parameters of  $\text{Bi}_{1-x}\text{Sm}_x\text{Fe}_{1-x}\text{Ti}_x\text{O}_3$

| Samples  | Phase              | Lattice Parameters                 | Atoms                           | x       | y       | z       | R-factors                                                                     |
|----------|--------------------|------------------------------------|---------------------------------|---------|---------|---------|-------------------------------------------------------------------------------|
| x = 0.04 | R3c                | a=b=5.5814Å, c=13.8338Å            | Bi/Sm                           | 0       | 0       | 0       | $R_p = 2.3, R_{wp} = 2.16,$<br>$R_{Bragg} = 8.11, R_F = 5.71, \chi^2 = 1.67$  |
|          |                    |                                    | Fe/Ti                           | 0       | 0       | 0.22368 |                                                                               |
|          |                    |                                    | O                               | 0.49704 | 0.03922 | 0.95086 |                                                                               |
| x = 0.08 | R3c                | a=b=5.5712Å, c=13.8247Å            | Bi/Sm                           | 0       | 0       | 0       | $R_p = 2.93, R_{wp} = 2.76,$<br>$R_{Bragg} = 14.5, R_F = 7.59, \chi^2 = 1.86$ |
|          |                    |                                    | Fe/Ti                           | 0       | 0       | 0.23235 |                                                                               |
|          |                    |                                    | O                               | 0.46471 | 0.03047 | 0.95387 |                                                                               |
| x = 0.12 | R3c                | a=b=5.5682Å, c=13.8014Å            | Bi/Sm                           | 0       | 0       | 0       | $R_p = 3.25, R_{wp} = 3.02,$<br>$R_{Bragg} = 15.5, R_F = 8.52, \chi^2 = 1.95$ |
|          |                    |                                    | Fe/Ti                           | 0       | 0       | 0.2365  |                                                                               |
|          |                    |                                    | O                               | 0.55293 | 0.07    | 0.95391 |                                                                               |
| x = 0.16 | R3c                | a=b=5.5388Å, c=13.701Å             | Bi/Sm                           | 0       | 0       | 0       | $R_p = 4.94, R_{wp} = 3.56,$<br>$R_{Bragg} = 11.4, R_F = 7.02, \chi^2 = 1.76$ |
|          |                    |                                    | Fe/Ti                           | 0       | 0       | 0.24417 |                                                                               |
|          |                    |                                    | O                               | 0.22471 | 0.19902 | 0.32194 |                                                                               |
|          | Pn <sub>2</sub> 1a | a=5.6104Å, b=7.7868Å,<br>c=5.4418Å | Bi/Sm                           | 0.00338 | 0.23821 | 1.00193 | $R_p = 4.94, R_{wp} = 3.56,$<br>$R_{Bragg} = 18.4, R_F = 13.9, \chi^2 = 1.76$ |
|          |                    |                                    | Fe/Ti                           | 0.04025 | 0       | 0.44432 |                                                                               |
|          |                    |                                    | O1                              | 0.11873 | 0.35961 | 0.5123  |                                                                               |
|          |                    |                                    | O2                              | 0.32532 | 0.15707 | 0.05413 |                                                                               |
|          |                    |                                    | O3                              | 0.95438 | 0.63235 | 0.96866 |                                                                               |
|          |                    |                                    | phase1= 53.36%, phase2 = 46.64% |         |         |         |                                                                               |
| x = 0.20 | R3c                | a=b=5.5304Å, c=13.6294Å            | Bi/Sm                           | 0       | 0       | 0       | $R_p = 5.77, R_{wp} = 3.90,$<br>$R_{Bragg} = 14.6, R_F = 10.7, \chi^2 = 1.16$ |
|          |                    |                                    | Fe/Ti                           | 0       | 0       | 0.26011 |                                                                               |
|          |                    |                                    | O                               | 0.65102 | 0.14109 | 0.46514 |                                                                               |
|          | Pn <sub>2</sub> 1a | a=5.6013Å, b=7.8004Å,<br>c=5.405Å  | Bi/Sm                           | 0.00767 | 0.30543 | 1.02258 | $R_p = 5.77, R_{wp} = 3.90,$<br>$R_{Bragg} = 20.3, R_F = 21.1, \chi^2 = 1.16$ |
|          |                    |                                    | Fe/Ti                           | 0.00657 | 0       | 0.46238 |                                                                               |
|          |                    |                                    | O1                              | 0.2362  | 0.34367 | 0.55024 |                                                                               |
|          |                    |                                    | O2                              | 0.32532 | 0.15707 | 0.05413 |                                                                               |
|          |                    |                                    | O3                              | 0.95438 | 0.63235 | 0.96866 |                                                                               |
|          |                    |                                    | phase1= 43.45%, phase2 = 56.55% |         |         |         |                                                                               |
